# Supplementary material for: Synthesis, Anti-Cancer and Anti-Migratory Evaluation of 3,6-Dibromocarbazole and 5-Bromoindole Derivatives
Source: PubMed Central journal article supplement (PMC6696445; doi:10.3390/molecules24152686), 2019-07-24
Supplement: molecules-24-02686-s001.pdf [file molecules-24-02686-s001.pdf]

-Supplementary Material-

## **Synthesis, anti-cancer and anti-migratory evaluation of 3,6-dibromocarbazole and 5-bromoindole derivatives**

Krystal M. Butler-Fernández<sup>1</sup>, Zulma Ramos<sup>1</sup>, Adela M. Francis-Malavé<sup>2</sup>, Joseph Bloom<sup>1</sup>, Suranganie Dharmawardhane<sup>3</sup> and Eliud Hernández<sup>1,\*</sup>

<sup>a</sup>*Department of Pharmaceutical Sciences, University of Puerto Rico, School of Pharmacy, San Juan, PR 00936*

<sup>c</sup>*Department of Biology, College of Natural Sciences, University of Puerto Rico, San Juan, PR 00931*

<sup>b</sup>*Department of Biochemistry, University of Puerto Rico, School of Medicine, San Juan, PR 00936*

\* Correspondence: eliud.hernandez@upr.edu; Tel.: +1 (787) 758-2525, Ext. 5436 (P.R.)

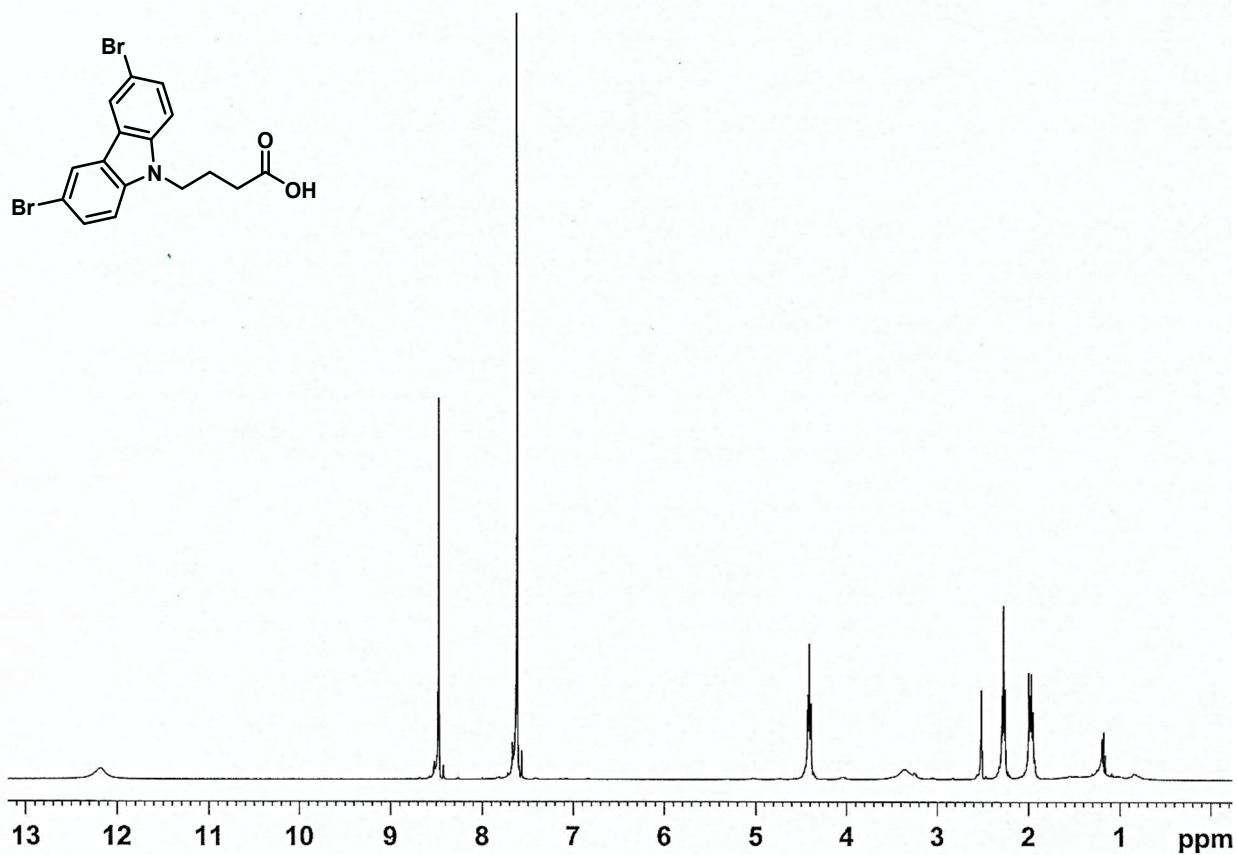

Figure S1: <sup>1</sup>H NMR Spectral Data of 2

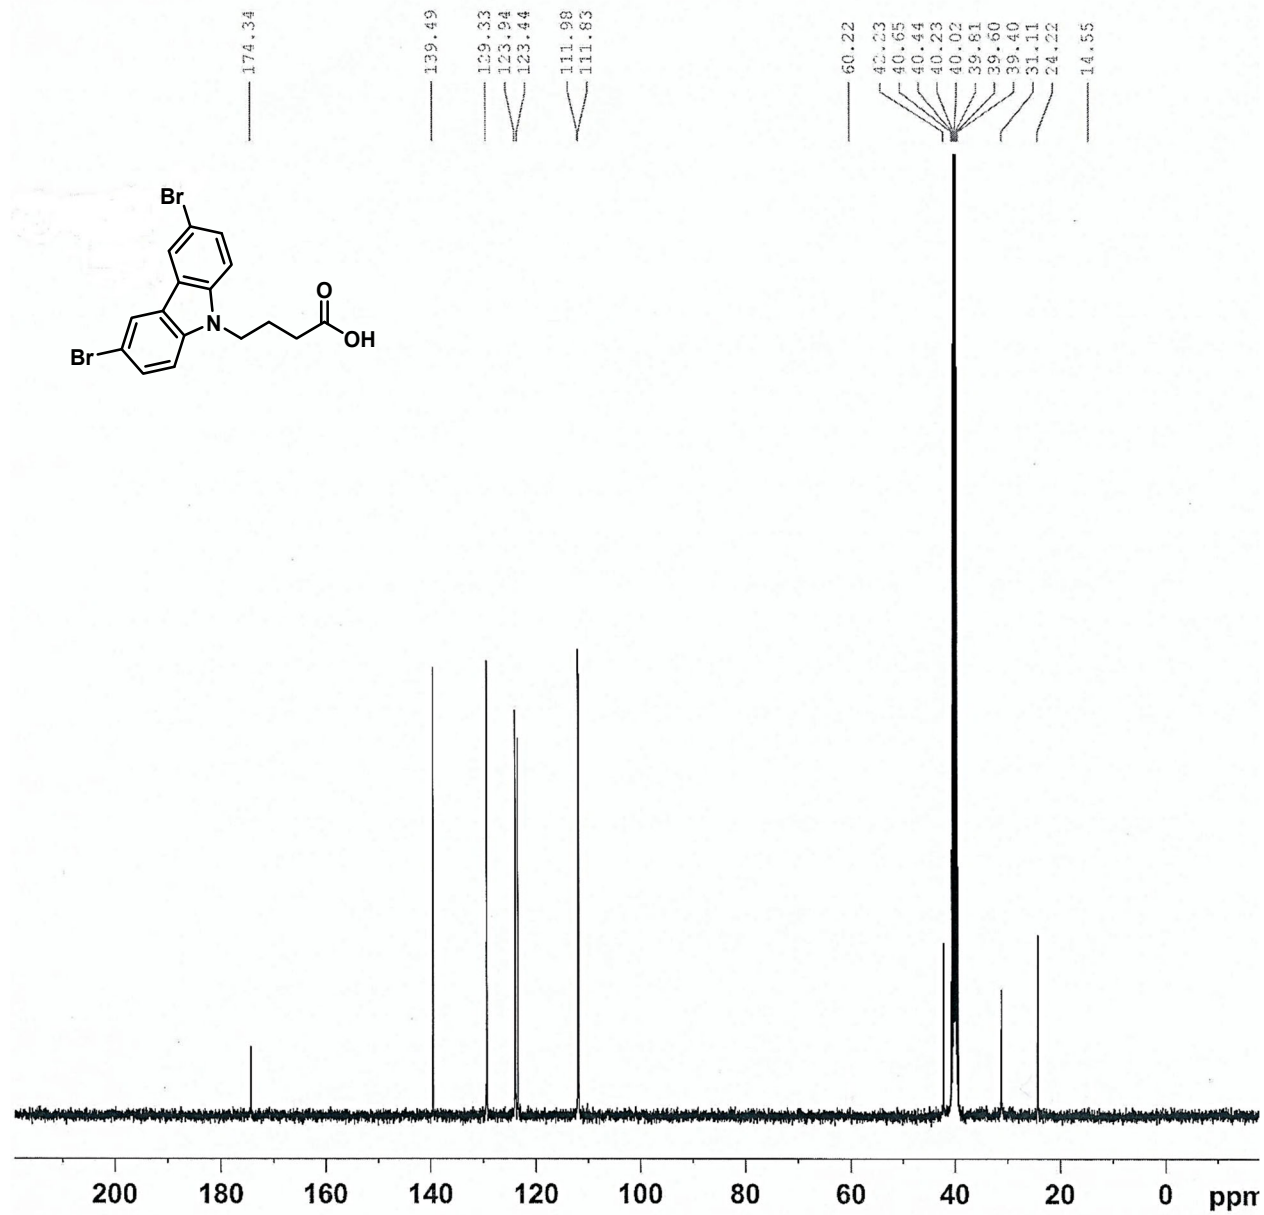

Figure S2:  $^{13}\text{C}$  NMR Spectral Data of 2

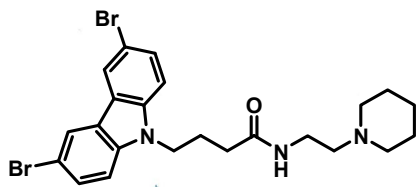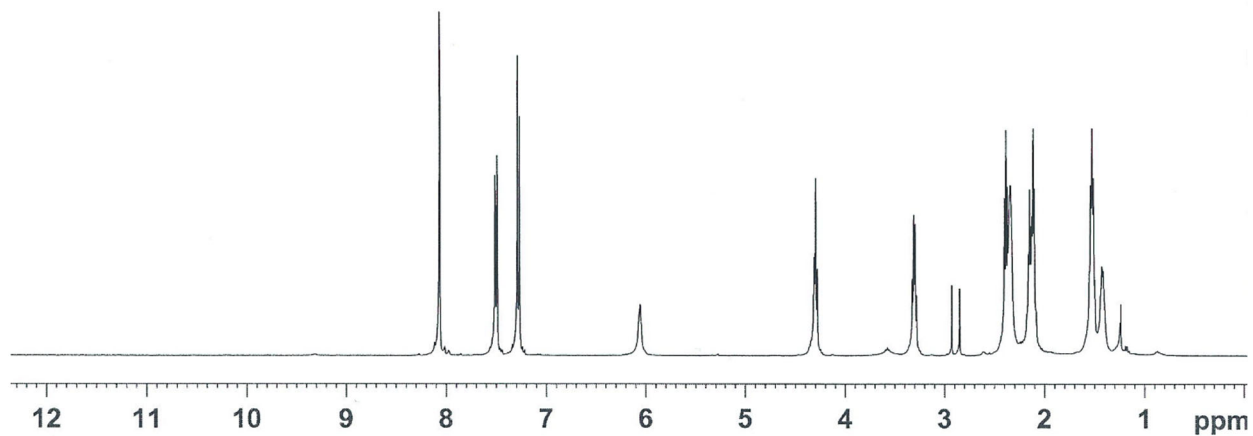

**Figure S3:** <sup>1</sup>H NMR Spectral Data of 7

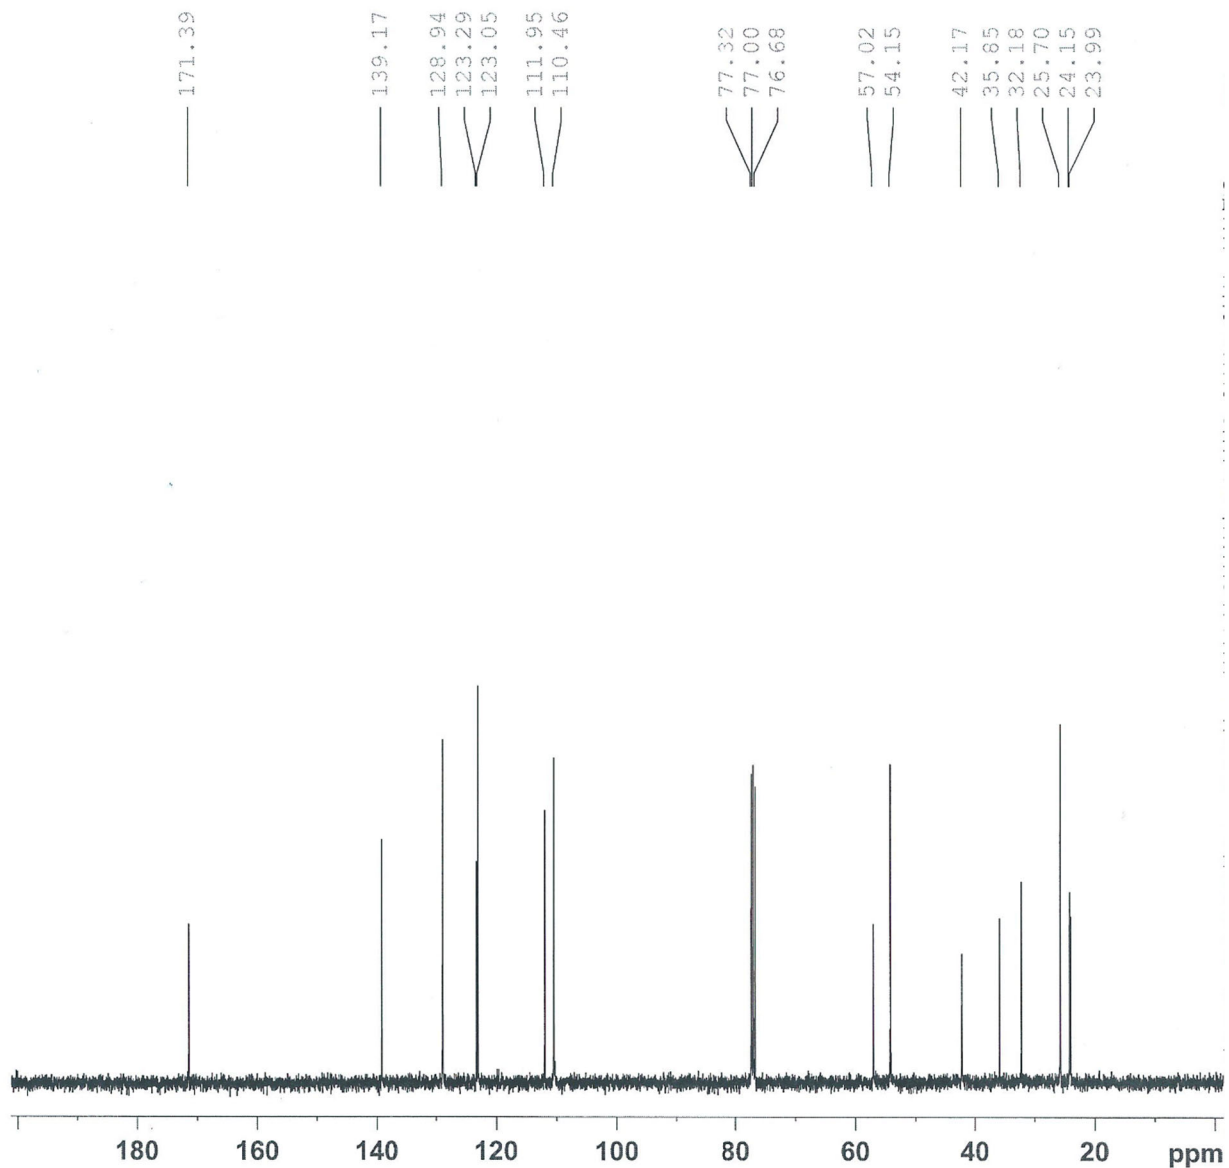

**Figure S4:**  $^{13}\text{C}$  NMR Spectral Data of 7

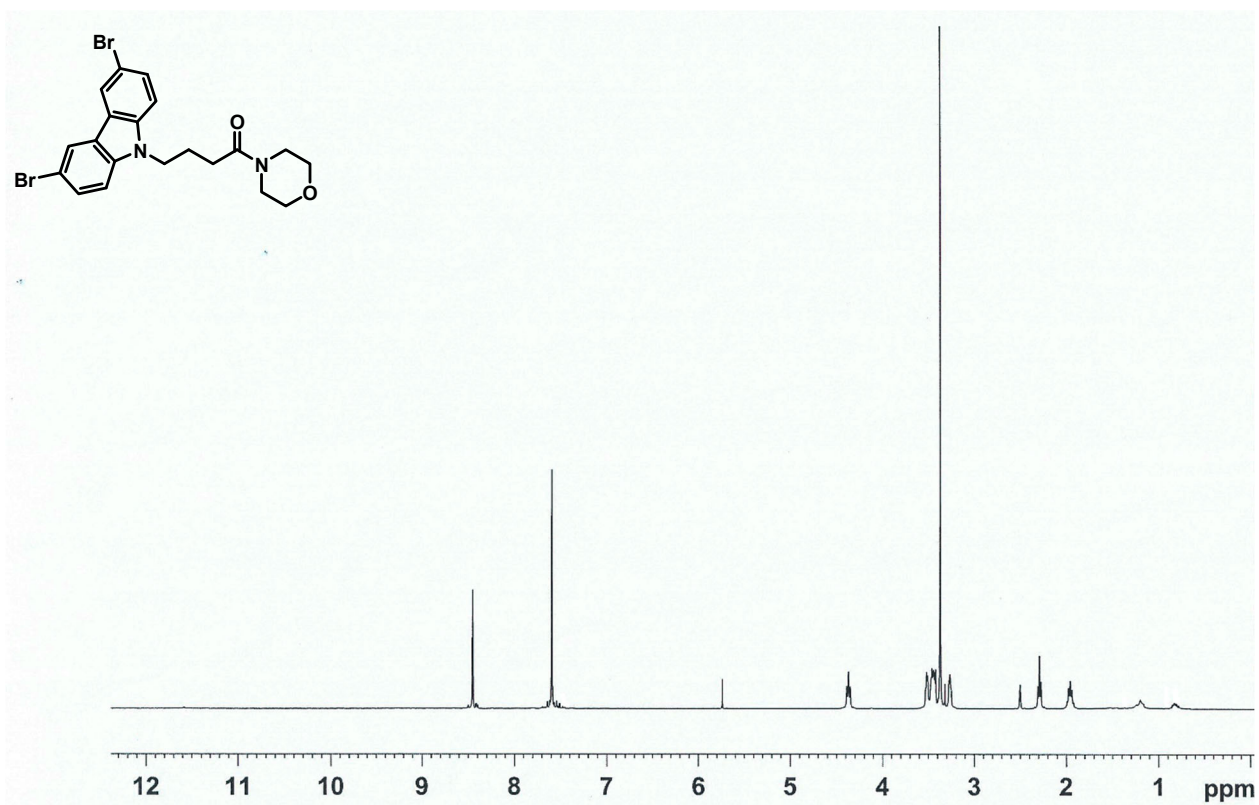

**Figure S5:** <sup>1</sup>H NMR Spectral Data of **12**

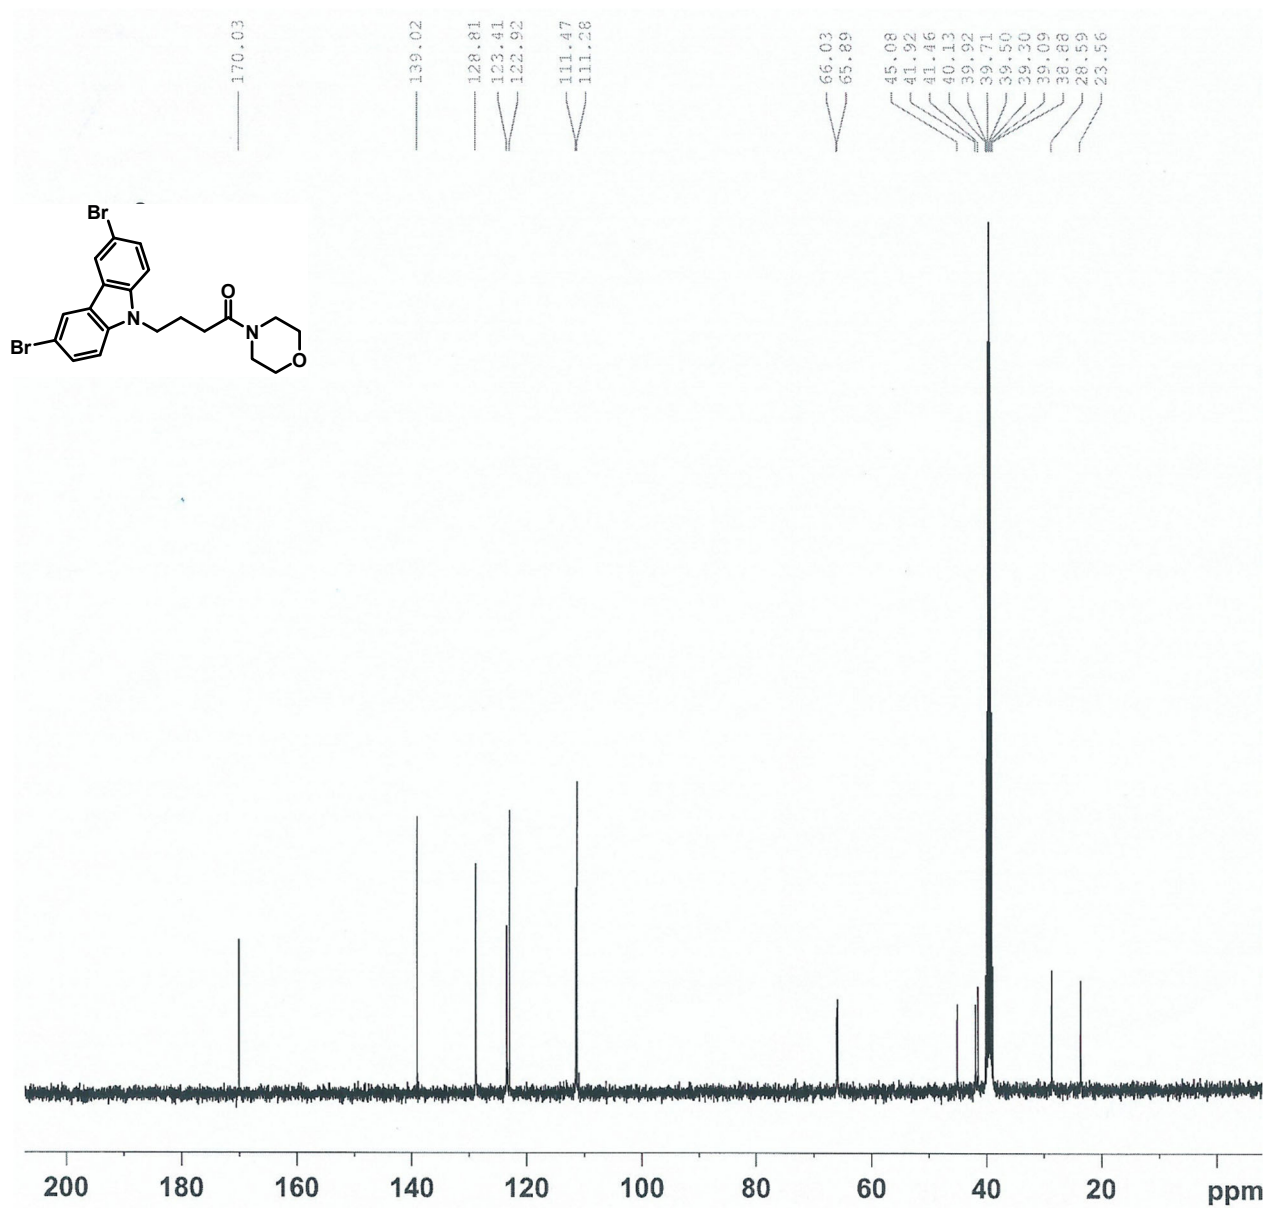

Figure S6: <sup>13</sup>C NMR Spectral Data of 12

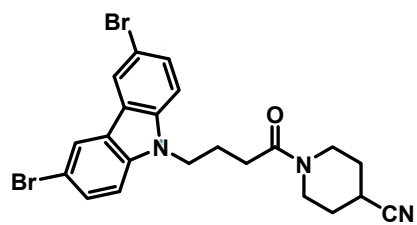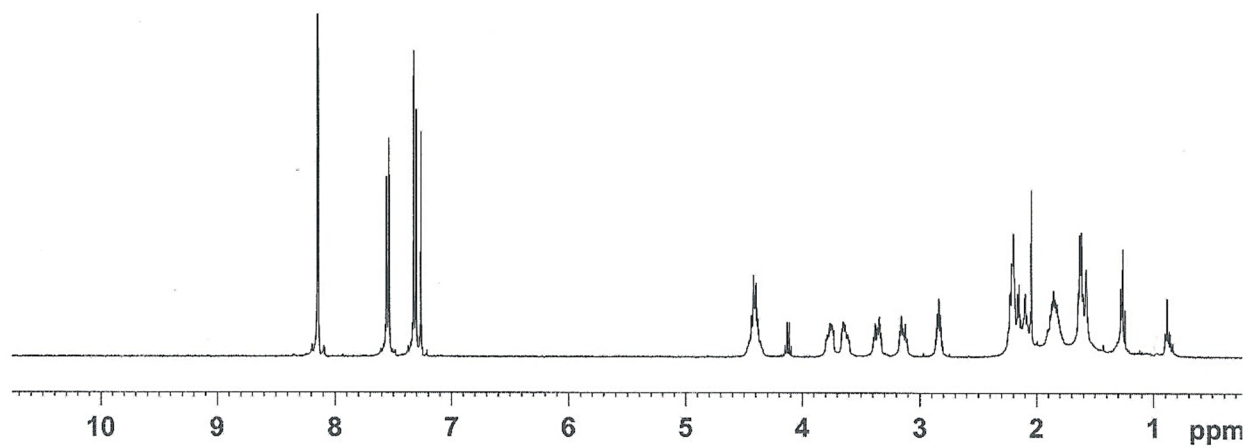

Figure S7: <sup>1</sup>H NMR Spectral Data of 14



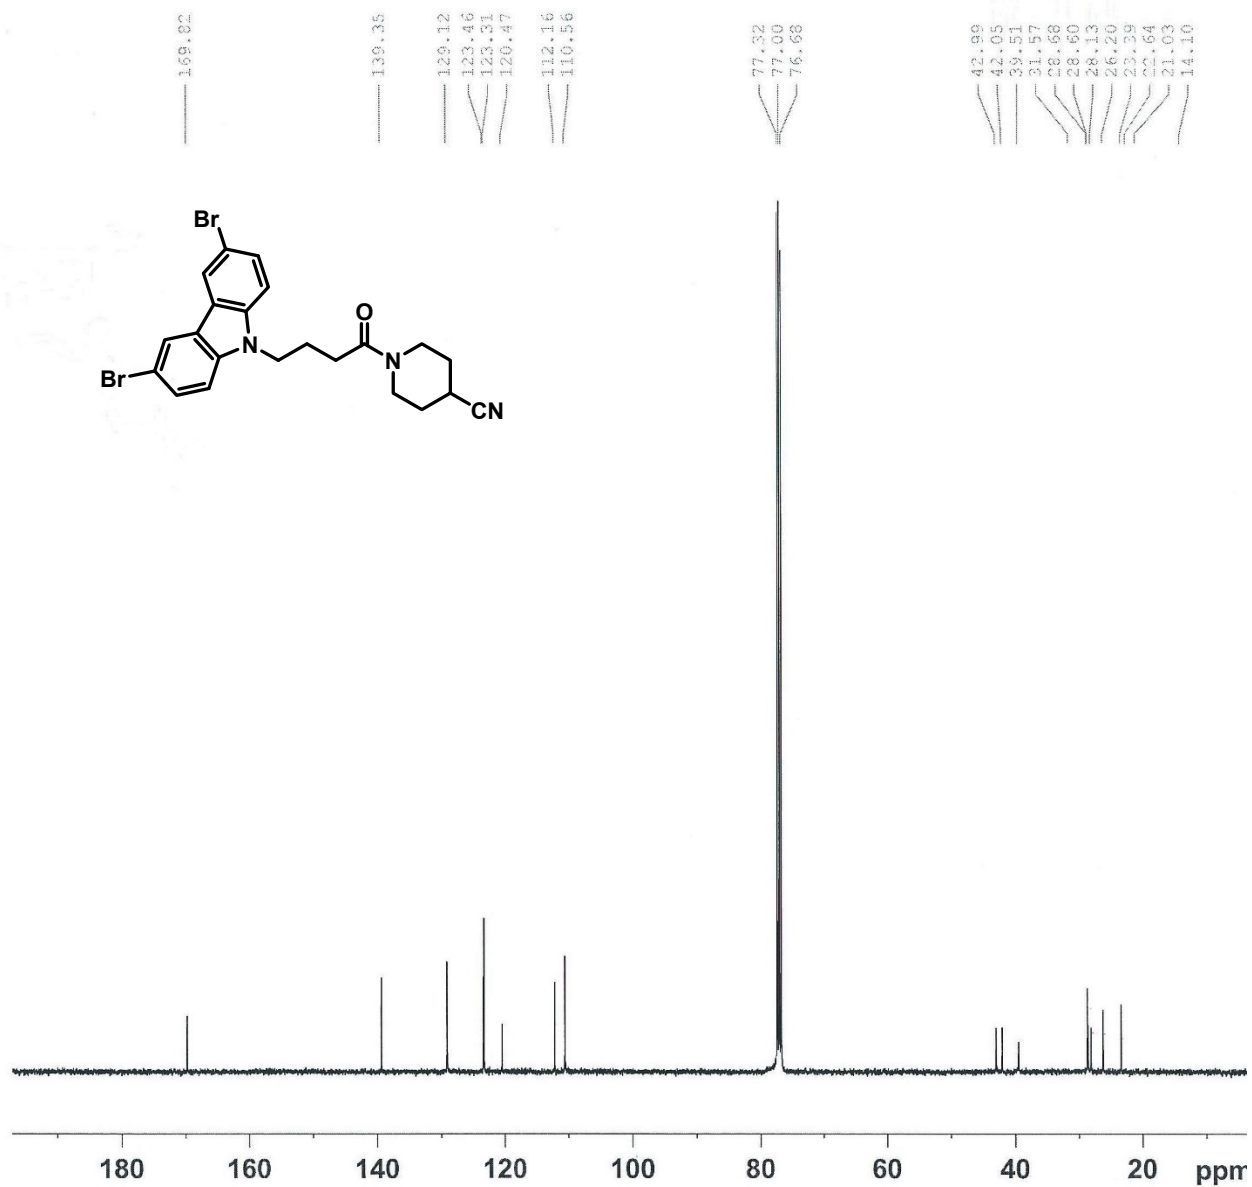

Figure S8: <sup>13</sup>C NMR Spectral Data of 14

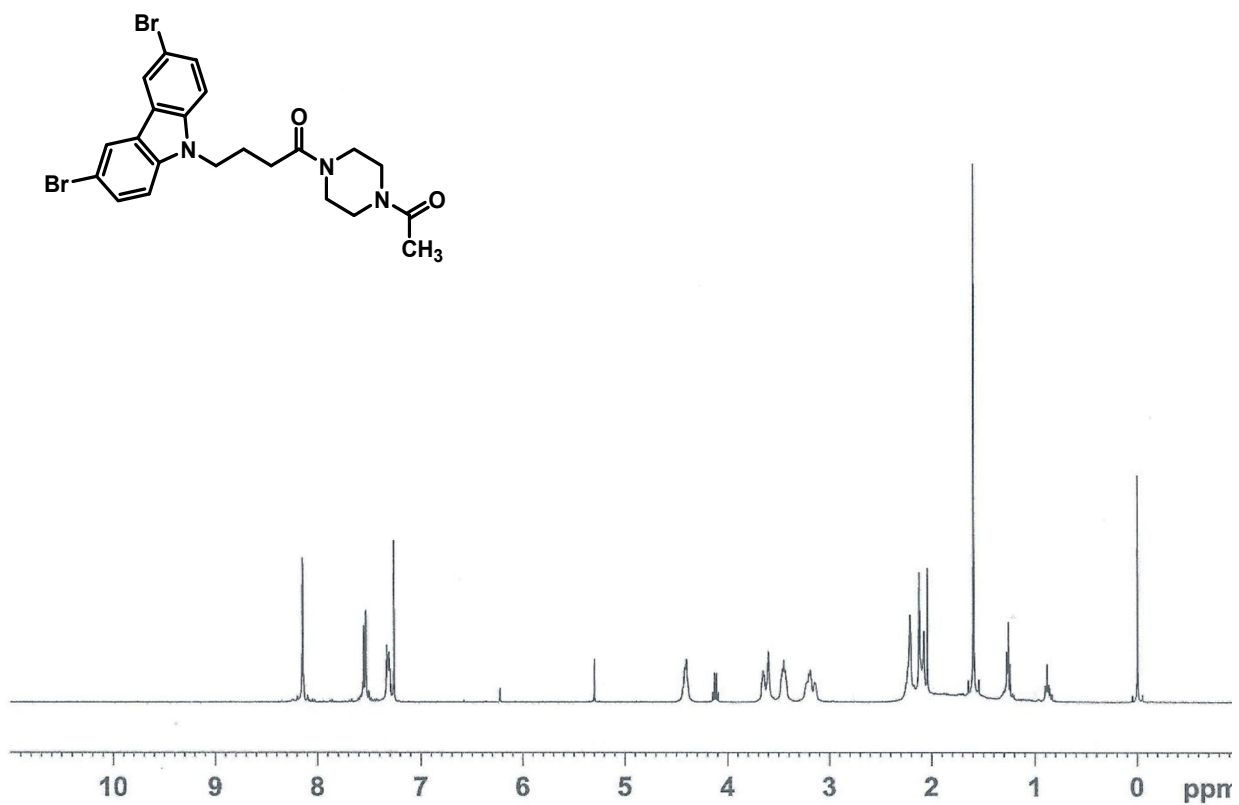

**Figure S9:**  $^1\text{H}$  NMR Spectral Data of **16**

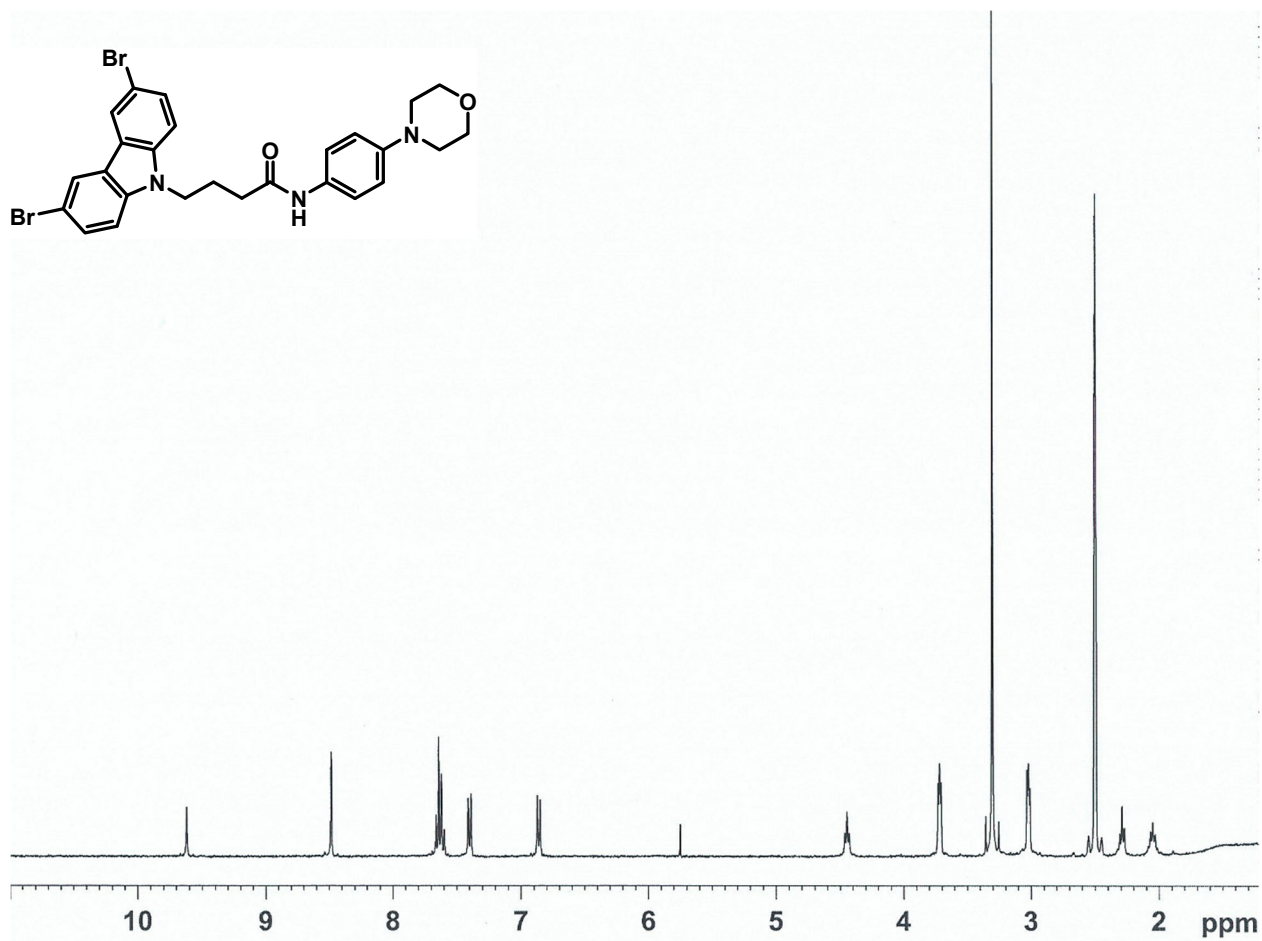

**Figure S10:** <sup>1</sup>H NMR Spectral Data of 22

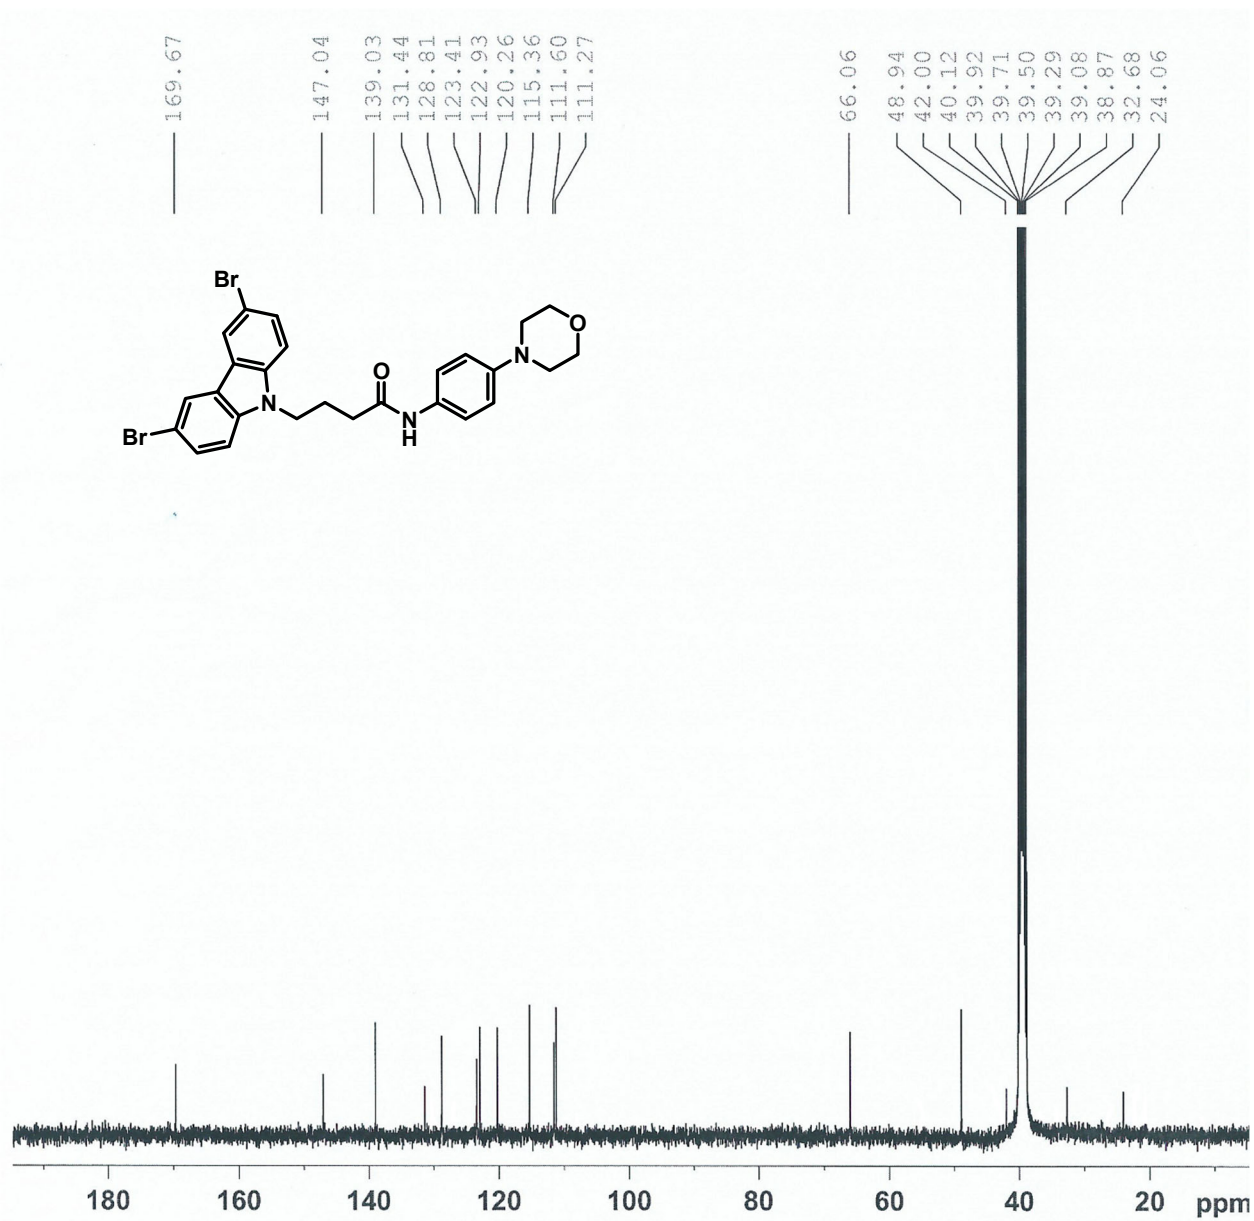

Figure S11: <sup>13</sup>C NMR Spectral Data of 22

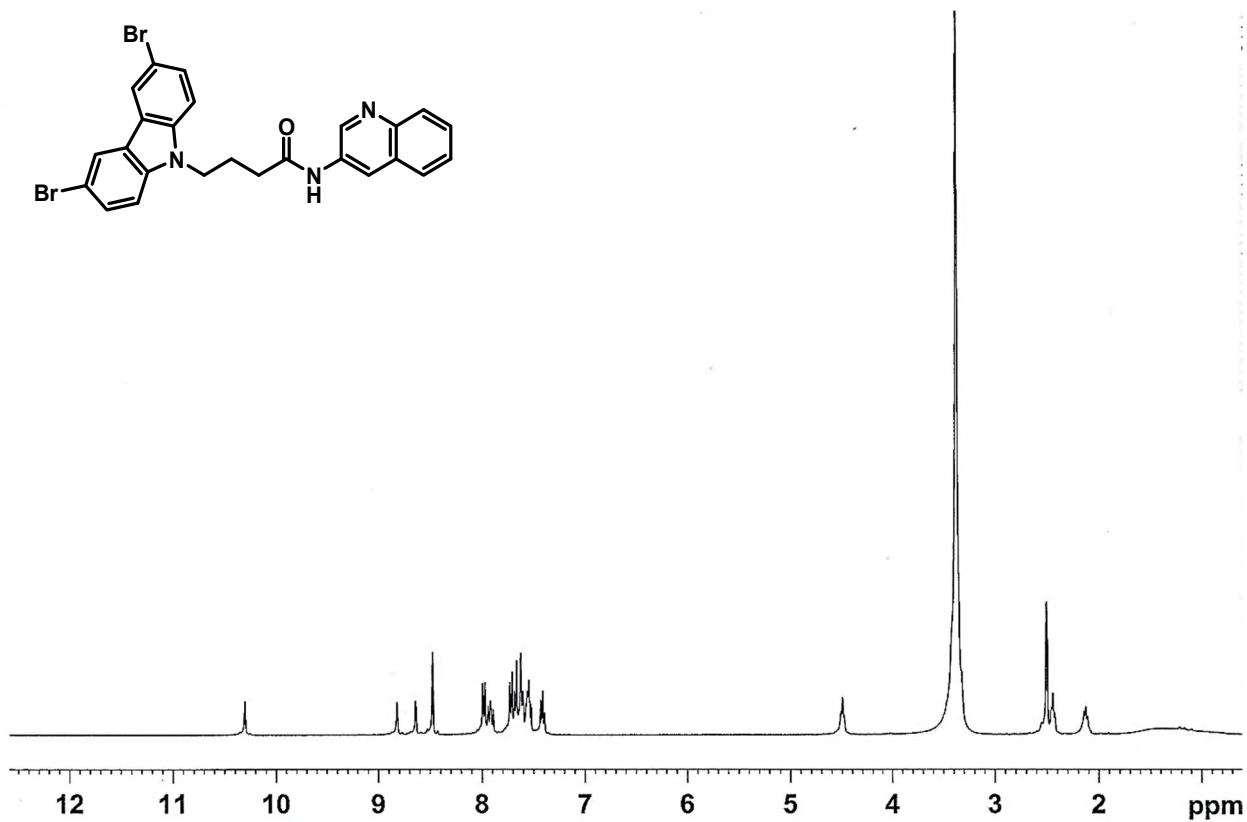

Figure S12: <sup>1</sup>H NMR Spectral Data of 24

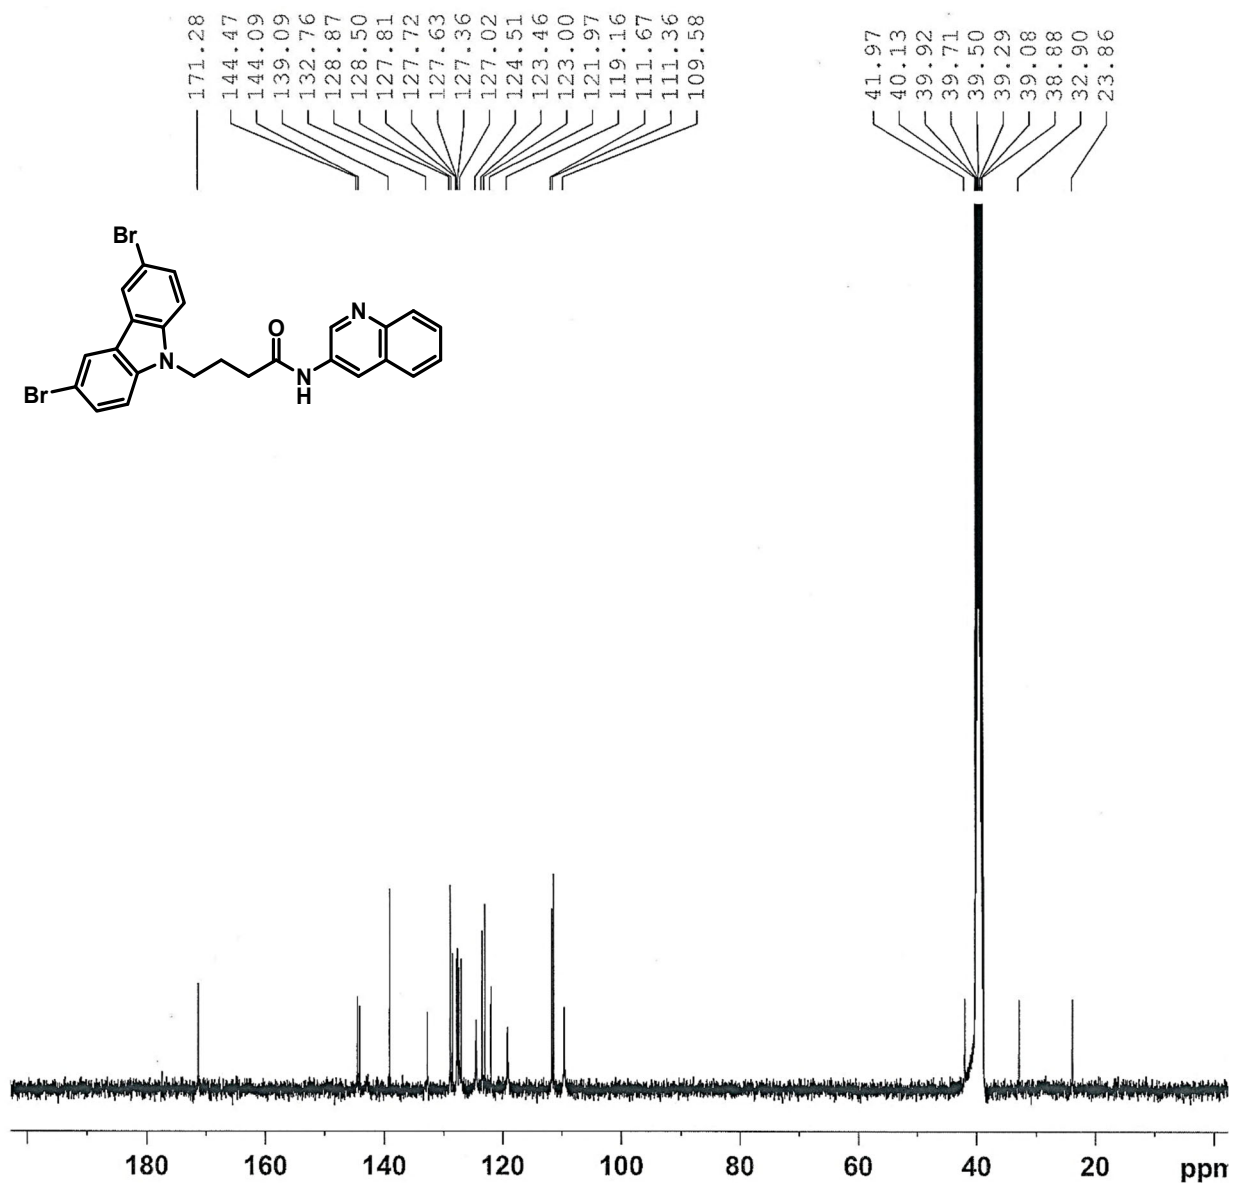

Figure S13: <sup>13</sup>C NMR Spectral Data of 24

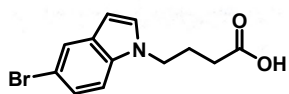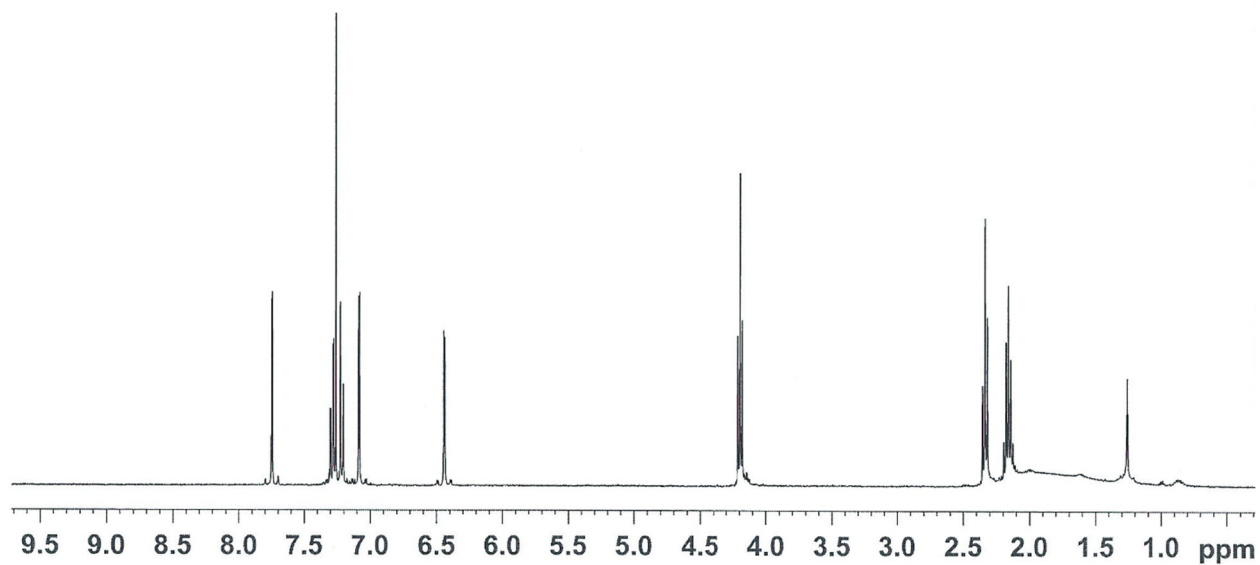

**Figure S14:**  $^1\text{H}$  NMR Spectral Data of **29**

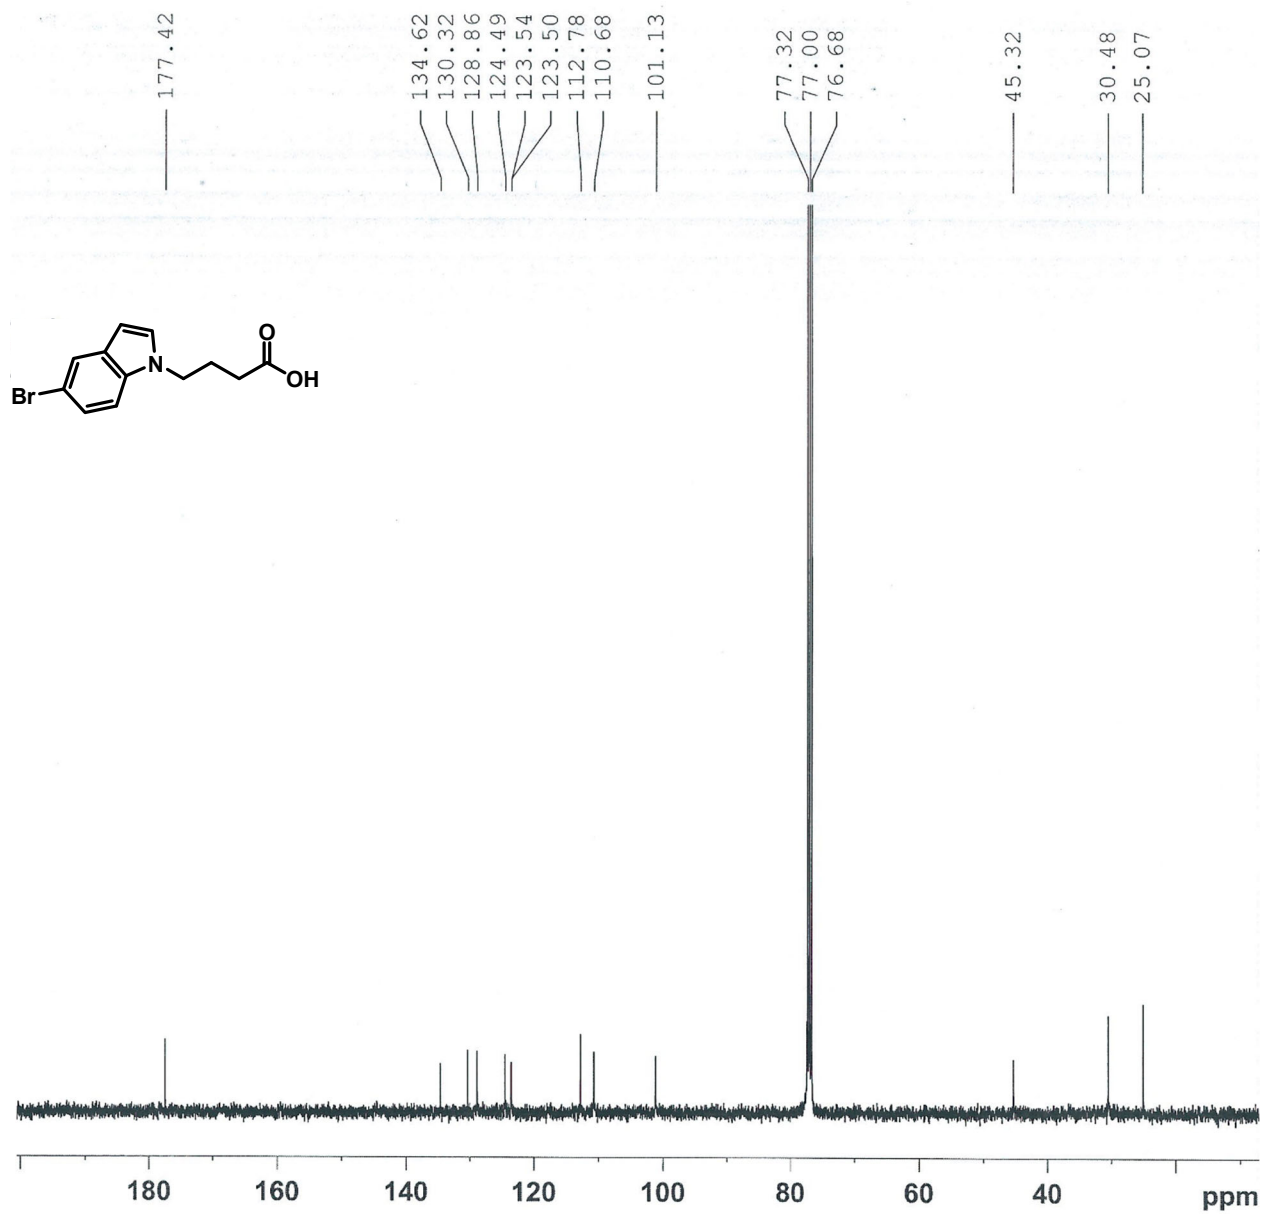

Figure S15:  $^{13}\text{C}$  NMR Spectral Data of 29



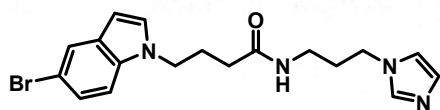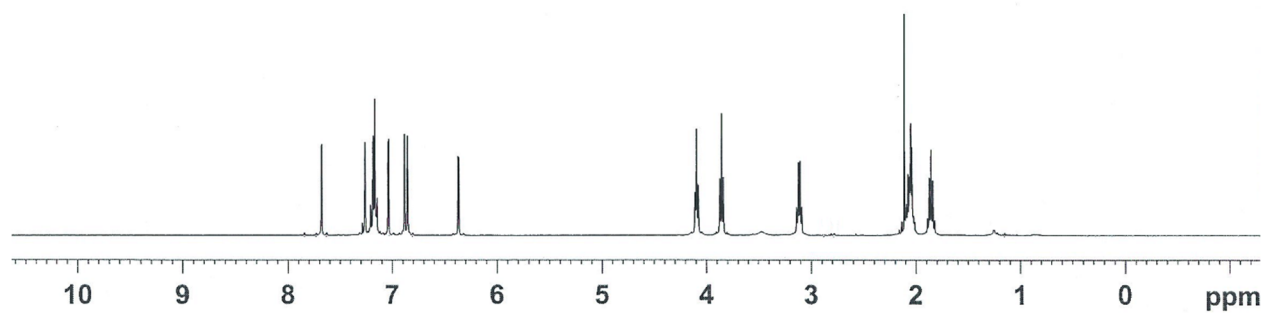

**Figure S16:**  $^1\text{H}$  NMR Spectral Data of **33**

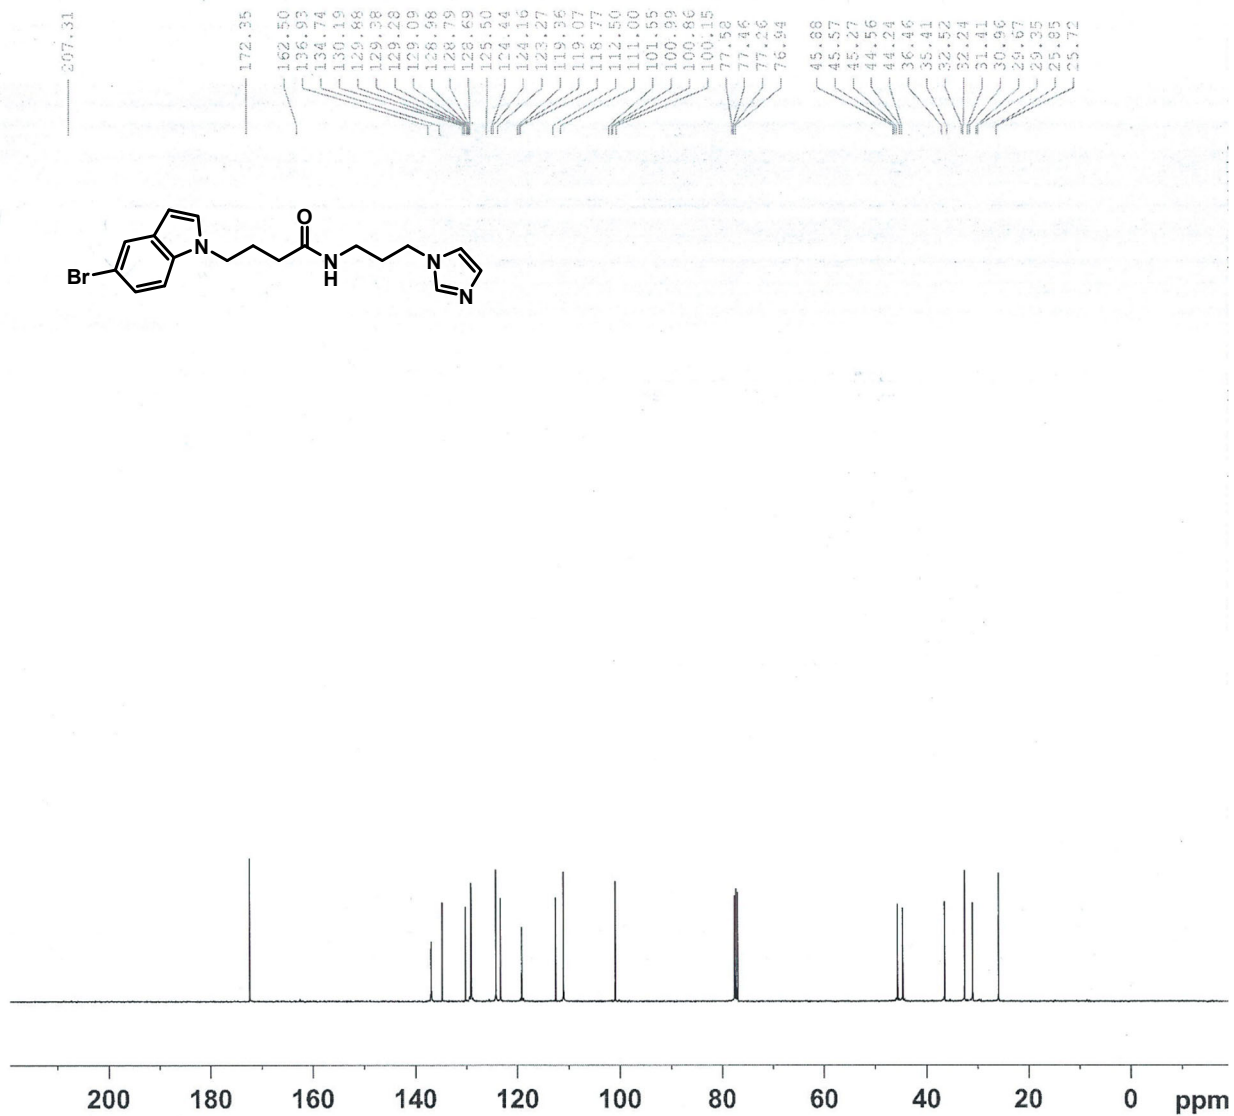

Figure S17: <sup>13</sup>C NMR Spectral Data of 33
